# Supplementary material for: Evaluating solvothermal and mechanochemical routes towards the metal–organic framework Mg 2 ( m -dobdc)
Source: Royal Society of Chemistry journal article supplement (doi:10.1039/d2ce00739h), 2022-01-01
Supplement: d2ce00739h1.pdf [file d2ce00739h1.pdf]

*Supporting Information for*

## **Evaluating Solvothermal and Mechanochemical Routes towards the Metal-Organic Framework $\text{Mg}_2(m\text{-dobdc})$**

Elena Y. Chen,<sup>a,†</sup> Ruth M. Mandel,<sup>a,†</sup> Phillip J. Milner<sup>a,\*</sup>

<sup>a</sup>Department of Chemistry and Chemical Biology, Cornell University, Ithaca, NY, 14850, United States

\*pjm347@cornell.edu

†Contributed equally.

### **Table of Contents:**

|                                                                                                          |    |
|----------------------------------------------------------------------------------------------------------|----|
| 1. General procedures.....                                                                               | 2  |
| 2. Synthesis of $\text{H}_4m\text{-dobdc}$ . ....                                                        | 4  |
| 3. Synthesis and characterization of solvothermal (ST) $\text{Mg}_2(m\text{-dobdc})\text{-ST}$ . ....    | 7  |
| a. Optimization of solvothermal $\text{Mg}_2(m\text{-dobdc})\text{-ST}$ synthesis.....                   | 7  |
| b. Synthesis of large-scale solvothermal $\text{Mg}_2(m\text{-dobdc})\text{-ST}$ . ....                  | 8  |
| 4. Synthesis and characterization of mechanochemical (MC) $\text{Mg}_2(m\text{-dobdc})\text{-MC}$ . .... | 16 |
| a. Optimization of mechanochemical $\text{Mg}_2(m\text{-dobdc})\text{-MC}$ synthesis. ....               | 16 |
| b. Large-scale synthesis of mechanochemical $\text{Mg}_2(m\text{-dobdc})\text{-MC}$ . ....               | 18 |
| 5. References. ....                                                                                      | 26 |

## 1. General procedures.

All reagents and materials, including 2,4-dihydroxybenzoic acid (97%, Oakwood Chemical),  $\text{KHCO}_3$  (99%, Oakwood Chemical),  $\text{CO}_2$  (bone dry, Airgas), concentrated HCl (36.5–38.0%, J.T. Baker), deuterated dimethyl sulfoxide ( $\text{DMSO-d}_6$ , 99%, Cambridge Isotope Laboratories),  $\text{Mg}(\text{NO}_3)_2 \cdot 6\text{H}_2\text{O}$  (98–102%, Beantown Chemical),  $\text{Mg}(\text{OAc})_2 \cdot 4\text{H}_2\text{O}$  (98–102%, Alfa Aesar), MgO (97+%, Oakwood Chemical), *N,N*-dimethylformamide (DMF, 99.8%, Fischer Scientific), *N,N*-dimethylacetamide (DMA, 99%, Acros Organics), methanol (MeOH, 99.8%, Fischer Scientific), ethanol (EtOH, 95%, Fischer Scientific), NaOH (pellet USP 98%, Oakwood Chemical), acetone (99.5%, Petroleum and Solvents), DCl (35 wt % solution in  $\text{D}_2\text{O}$ , 99 atom % D, Sigma-Aldrich), *N,N*-diisopropylethylamine (Hünig's base, 99%, Sigma-Aldrich), triethylamine ( $\text{Et}_3\text{N}$ , 99.5%, Sigma-Aldrich), and 2,6-lutidine (redistilled 99+%, Sigma-Aldrich) were purchased from commercial vendors and used without further purification, unless otherwise specified.

Infrared (IR) spectra were collected on a Bruker Tensor II IR spectrometer equipped with a diamond Attenuated Total Reflectance (ATR) attachment. Surface area data were collected on a Micromeritics ASAP 2460 or 2020 gas sorption analyzer using ultrapure  $\text{N}_2$  (99.999%) and a liquid  $\text{N}_2$  bath. Brunauer-Emmett-Teller (BET) and Langmuir surface areas were determined by linear least squares regression analysis using the linearized forms of the BET and Langmuir equations, respectively.  $\text{CO}_2$  adsorption isotherms were collected on a Micromeritics ASAP 2020 gas sorption analyzer. A circulating water bath was used for isotherms carried out at 30 °C, 40 °C, and 50 °C. Prior to gas adsorption measurements, MOFs were activated at 180 °C (ramp rate of 1 °C/min) under high vacuum (<10  $\mu\text{bar}$ ) for 24 h on a Micromeritics Smart VacPrep system. We have consistently observed lower surface areas when faster ramp rates are employed to activate  $\text{Mg}_2(m\text{-dobdc})$ , likely due to partial pore collapse if it is heated too quickly. Powder X-ray diffraction (PXRD) patterns were collected on a Rigaku Ultima IV diffractometer or a Bruker D8 Advance ECO diffractometer equipped with a Cu  $\text{K}\alpha$  source ( $\lambda = 1.5406 \text{ \AA}$ ). Experimental PXRD patterns were baseline corrected using OriginPro.  $^1\text{H}$  and  $^{13}\text{C}$  NMR data were collected on a Bruker INOVA 500 or 400 MHz spectrometer and are referenced to residual solvent. Thermogravimetric decomposition profiles were collected on a TA Instruments TGA Q5000 thermogravimetric analyzer (TGA) using a temperature ramp of 3.00 °C/min from 40.00 °C to 600.00 °C under an atmosphere of flowing  $\text{N}_2$  (flow rate of 60 mL/min). Scanning electron microscopy (SEM) images were taken at 1.0 kV using a Zeiss Gemini 500 scanning electron microscope. The powder samples were immobilized on carbon tape mounted on an aluminum stub. The samples were blown using compressed air to remove excess material not stuck to the tape and then were coated with a carbon layer.

$\text{CO}_2$  adsorption data were fit using the dual-site Langmuir-Freundlich model (eq. S1), where  $Q(P)$  is the predicted uptake  $Q$  at pressure  $P$  in mmol/g,  $Q_{\text{sat}i}$  is the saturation pressure of binding site  $i$  in mmol/g,  $b_i$  is the Langmuir parameter of site  $i$ ,  $v_i$  is the Freundlich parameter of site  $i$ ,  $-S_i$  is the entropy of binding site  $i$  in  $\text{J/mol}\cdot\text{K}$ ,  $R$  is the ideal gas constant,  $E_i$  is the enthalpy of adsorption for binding site  $i$  in  $\text{kJ/mol}$ , and  $T$  is the temperature in K. The isotherms were fit with  $v_1$  and  $v_2$  set as 1 (dual-site Langmuir model). Fits were obtained using Solver in Microsoft Excel.

$$Q(P) = \frac{Q_{sat1}(b_1P)^{v_1}}{1+(b_1P)^{v_1}} + \frac{Q_{sat2}(b_2P)^{v_2}}{1+(b_2P)^{v_2}}; b_i = e^{\left(\frac{-S_i}{R}\right)\left(\frac{1000 \cdot E_i}{RT}\right)} \quad \text{eq. S1}$$

Heats of adsorption were calculated using the Clausius-Clapeyron equation (eq. S2), where  $P_Q$  are pressure values corresponding to the same loading  $Q$ ,  $\Delta H_{ads}$  is the differential enthalpy of adsorption in kJ/mol,  $R$  is the ideal gas constant,  $T$  is the temperature in K, and  $c$  is a constant. Fits over a range of  $Q$  values were obtained using Mathematica.

$$\ln(P_Q) = \left(\frac{\Delta H_{ads}}{R}\right)\left(\frac{1}{T}\right) + c \quad \text{eq. S2}$$

Non-competitive selectivities ( $S$ ) were determined using eq. S3, where  $P_{CO_2}$  is 150 mbar,  $P_{N_2}$  is 750 mbar,  $Q_{CO_2}$  is the uptake at 150 mbar of  $CO_2$ , and  $Q_{N_2}$  is the uptake at 750 mbar of  $N_2$ .

$$S = (Q_{CO_2}/Q_{N_2})/(P_{CO_2}/P_{N_2}) \quad \text{eq. S3}$$

### General procedure for digesting MOFs.

$Mg_2(m\text{-dobdc})$  samples were digested by suspending ~5 mg of MOF in  $DMSO-d_6$  (~0.5 mL) in a vial and adding concentrated DCl in  $D_2O$  (5 drops). The suspension was sonicated until homogeneous and analyzed by  $^1H$  NMR.

## 2. Synthesis of H<sub>4</sub>m-dobdc.

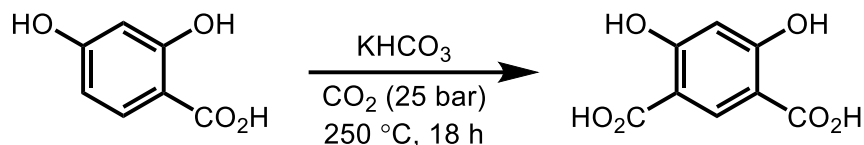

**Figure S1.** Synthesis of H<sub>4</sub>m-dobdc.

This procedure was adapted from the literature.<sup>1</sup> 2,4-dihydroxybenzoic acid (5.50 g, 35.7 mmol, 1.00 equiv.) and KHCO<sub>3</sub> (11.5 g, 115 mmol, 3.22 equiv.) were ground separately using a mortar and pestle and dried in a vacuum oven at 60 °C for 18 h. Once cooled to room temperature, the solids were thoroughly mixed together and sealed in a Parr reactor equipped with a pressure gauge and an internal temperature probe. The Parr reactor was pressurized with CO<sub>2</sub> to 25 bar and subsequently vented to the atmosphere. This process was repeated a total of three times. The Parr reactor was then pressurized a final time with CO<sub>2</sub> to 25 bar, sealed, and heated to 250 °C as measured by the internal temperature probe in a sand bath for 18 h. The final pressure of CO<sub>2</sub> in the Parr reactor reached 40 bar when fully heated. Note: in our hands, inconsistent results were obtained when an external thermometer was employed to monitor the reaction temperature. After 18 h, the Parr reactor was allowed to cool to room temperature and vented. Deionized (DI) water (500 mL) was added to the Parr reactor, and the mixture was sonicated until homogeneous. The solution was then acidified with concentrated HCl until pH < 1, at which time a pale pink solid precipitated from solution. The solid was collected by vacuum filtration, washed with DI water, and dried overnight to yield H<sub>4</sub>m-dobdc as a cream-colored powder (5.69 g, 80% yield). <sup>1</sup>H NMR (500 MHz, DMSO-d<sub>6</sub>): δ 8.30 (s, 1 H), 6.42 (s, 1 H) ppm (the carboxylic acid and phenol O–H resonances could not be reliably observed). This spectrum is consistent with that reported in the literature.<sup>1</sup> <sup>13</sup>C NMR (400 MHz, DMSO-d<sub>6</sub>): δ 173.95, 166.58, 135.17, 106.01, 103.26 ppm. ATR IR (powder, cm<sup>-1</sup>): 3017, 1644, 1596, 1462, 1421, 1327, 1271, 1241, 1157, 1129, 1063, 934, 894, 855, 841, 783, 739, 695, 603, 524.

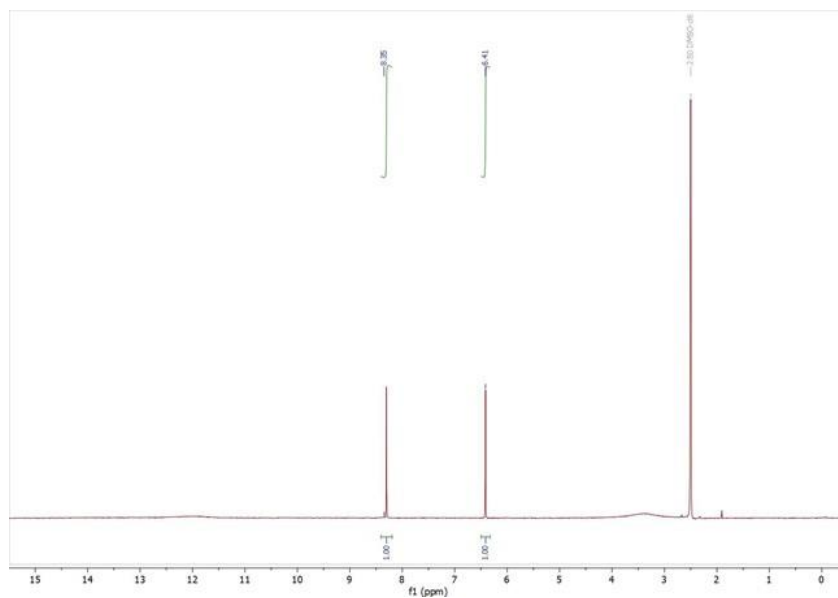

**Figure S2.**  $^1\text{H}$  NMR (500 MHz,  $\text{DMSO-d}_6$ ) spectrum of  $\text{H}_4m\text{-dobdc}$  used in this work.

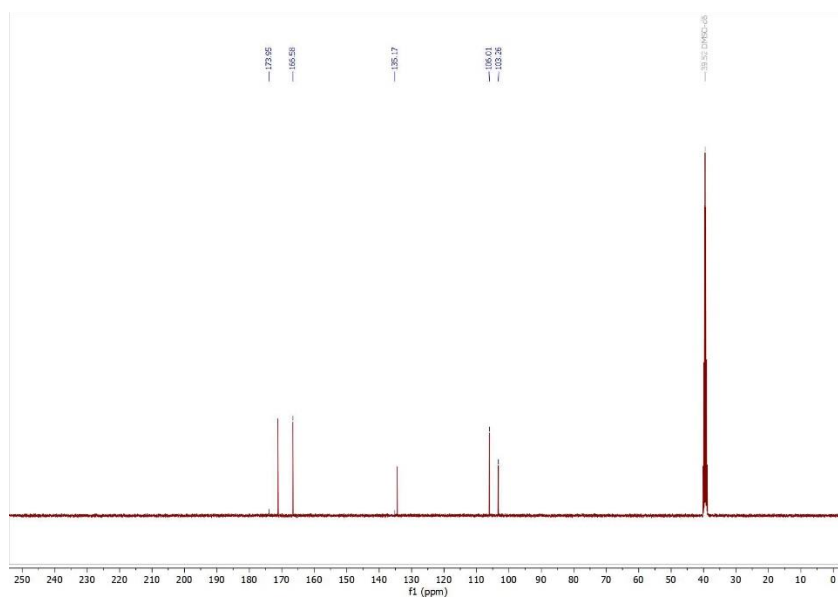

**Figure S3.**  $^{13}\text{C}$  NMR (400 MHz,  $\text{DMSO-d}_6$ ) spectrum of  $\text{H}_4m\text{-dobdc}$  used in this work.

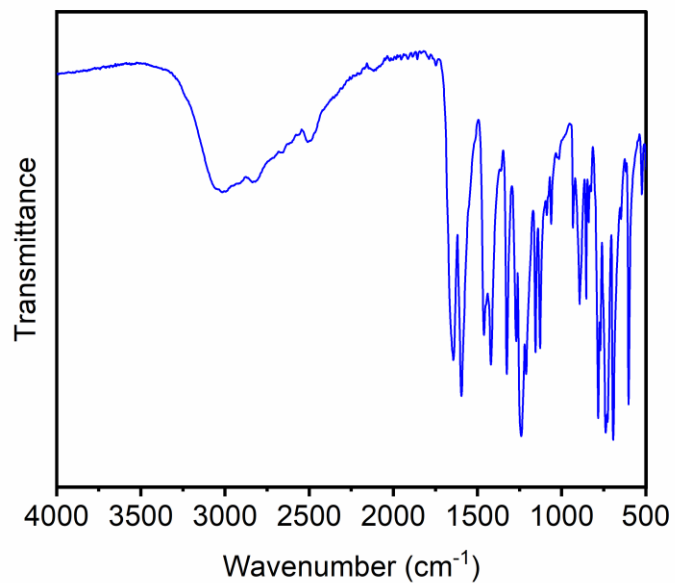

**Figure S4.** ATR IR spectrum of H<sub>4</sub>m-dobdc used in this work.

### 3. Synthesis and characterization of solvothermal (ST) Mg<sub>2</sub>(*m*-dobdc)-ST.

#### a. Optimization of solvothermal Mg<sub>2</sub>(*m*-dobdc)-ST synthesis.

**Procedure for small-scale solvothermal reactions (Table S1).** H<sub>4</sub>*m*-dobdc (29.7 mg, 0.150 mmol, 1.00 equiv.) and Mg(NO<sub>3</sub>)<sub>2</sub>·6H<sub>2</sub>O (96.2 mg, 0.375 mmol, 2.50 equiv.) or Mg(OAc)<sub>2</sub>·4H<sub>2</sub>O (80.5 mg, 0.375 mmol, 2.50 equiv.) were added to a 15 mL screw-cap reaction tube equipped with a stir bar along with the corresponding solvent mixtures indicated in Table S1 (5 mL). NaOH (1.00–6.00 equiv. relative to H<sub>4</sub>*m*-dobdc) was also added as indicated in Table S1. The tube was capped, and the reaction mixture was allowed to stir at 700 rpm at the temperature indicated in Table S1 for 24 h or until solid was observed in the reaction tube. If no solid formed after 72 h, the reaction was stopped. If solid formed, the reaction mixture was allowed to cool to room temperature and filtered, and the resulting solid was thoroughly rinsed with methanol. PXRD patterns were collected on the freshly washed solids. The tested conditions are based on those previously reported for the solvothermal preparations of M<sub>2</sub>(dobdc) MOFs.<sup>2–5</sup>

**Table S1.** Small-scale solvothermal Mg<sub>2</sub>(*m*-dobdc)-ST synthesis attempts. rt = room temperature.

| Condition | Mg Salt                                              | Solvent                   | NaOH added  | Temperature | Result                                         |
|-----------|------------------------------------------------------|---------------------------|-------------|-------------|------------------------------------------------|
| 1         | Mg(NO <sub>3</sub> ) <sub>2</sub> ·6H <sub>2</sub> O | 1:1 DMF:MeOH              | -           | 120 °C      | Pink solid, Mg <sub>2</sub> ( <i>m</i> -dobdc) |
| 2         |                                                      | 1:1 DMF:EtOH              | -           | 120 °C      | Pink solid, Mg <sub>2</sub> ( <i>m</i> -dobdc) |
| 3         |                                                      | 1:1 DMF:H <sub>2</sub> O  | -           | 120 °C      | No solid                                       |
| 4         |                                                      | 1:1 DMA:MeOH              | -           | 120 °C      | Pink solid, Mg <sub>2</sub> ( <i>m</i> -dobdc) |
| 5         |                                                      | 1:1 DMA:EtOH              | -           | 120 °C      | No solid                                       |
| 6         |                                                      | 1:1 DMA:H <sub>2</sub> O  | -           | 120 °C      | No solid                                       |
| 7         |                                                      | 2:1 DMF:MeOH              | -           | 120 °C      | Brown, amorphous solid                         |
| 8         | Mg(OAc) <sub>2</sub> ·4H <sub>2</sub> O              | H <sub>2</sub> O          | -           | 70 °C       | No solid                                       |
| 9         |                                                      | 1:1 THF:H <sub>2</sub> O  | -           | 70 °C       | No solid                                       |
| 10        |                                                      | 1:1 EtOH:H <sub>2</sub> O | -           | 70 °C       | No solid                                       |
| 11        |                                                      | EtOH                      | -           | 70 °C       | No solid                                       |
| 12        |                                                      | H <sub>2</sub> O          | 1.00 equiv. | rt          | No solid                                       |
| 13        |                                                      |                           | 2.00 equiv. | rt          | No solid                                       |
| 14        |                                                      |                           | 3.00 equiv. | rt          | Wrong phase                                    |
| 15        |                                                      |                           | 4.00 equiv. | rt          | Wrong phase                                    |
| 16        |                                                      |                           | 5.00 equiv. | rt          | No solid                                       |
| 17        |                                                      |                           | 6.00 equiv. | rt          | No solid                                       |

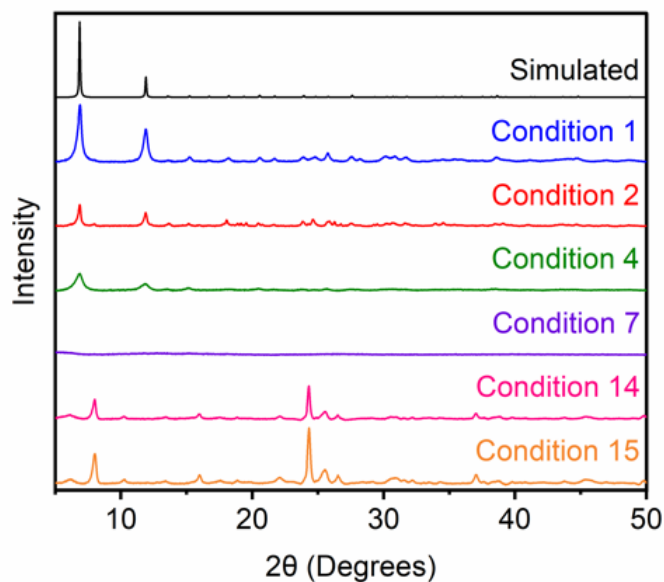

**Figure S5.** PXRD patterns ( $\lambda = 1.5406 \text{ \AA}$ ) of solvothermal  $\text{Mg}_2(m\text{-dobdc})\text{-ST}$  synthesis attempts. Condition 1 (Table S1) yielded the highest quality material and thus was employed for the large-scale synthesis of  $\text{Mg}_2(m\text{-dobdc})\text{-ST}$  under solvothermal conditions. The simulated pattern based on the previously reported single-crystal X-ray diffraction structure of the isostructural framework  $\text{Co}_2(m\text{-dobdc})$  is included for reference.<sup>6</sup>

### b. Synthesis of large-scale solvothermal $\text{Mg}_2(m\text{-dobdc})\text{-ST}$ .

**Procedure for large-scale solvothermal synthesis.**  $\text{H}_4m\text{-dobdc}$  (0.558 g, 2.82 mmol, 1.00 equiv.) and  $\text{Mg}(\text{NO}_3)_2 \cdot 6\text{H}_2\text{O}$  (1.81 g, 7.05 mmol, 2.50 equiv.) were added to a 1 L screw-cap, high-pressure reaction vessel equipped with a stir bar. DMF (135 mL) and methanol (135 mL) were added, and the reaction vessel was sealed. The flask was placed in a silicone oil bath and heated to  $120 \text{ }^\circ\text{C}$  with stirring at 700 rpm. The reaction mixture was allowed to stir at  $120 \text{ }^\circ\text{C}$  for 48 h. At this time, the reaction mixture was cooled to room temperature and filtered. The resulting solid was rinsed with DMF and transferred to a 1 L Pyrex jar. DMF (500 mL) was added, and the jar was placed in an oven that had been pre-heated to  $120 \text{ }^\circ\text{C}$ . The jar was allowed to stand at  $120 \text{ }^\circ\text{C}$  for 24 h. At this time, the jar was allowed to cool to room temperature, and the DMF was decanted. Fresh DMF (500 mL) was added, and the jar was returned to the oven. This process was repeated for a total of three hot DMF washes. After decanting the third DMF wash, methanol (500 mL) was added to the jar, and the jar was placed in an oven that had been pre-heated to  $60 \text{ }^\circ\text{C}$ . The soaking process outlined above was repeated for a total of three hot MeOH washes. After decanting the third MeOH wash, acetone (500 mL) was added to the jar, and the jar was allowed to stand at room temperature. The soaking process outlined above was repeated for a total of three room temperature acetone washes. After the final acetone wash was decanted, the light-brown solid was transferred to a 10 mL Schlenk flask and activated under high vacuum ( $<100 \text{ mbar}$ ) at  $180 \text{ }^\circ\text{C}$  in a sand bath (ramp rate  $1 \text{ }^\circ\text{C}/\text{min}$ ) for 24 h to yield activated  $\text{Mg}_2(m\text{-dobdc})\text{-ST}$  (470 mg, 69% yield).



as a tan-colored solid. Approximately 50 mg of MOF was transferred to a Micromeritics ASAP tube and activated under high vacuum ( $<10 \mu\text{bar}$ ) at  $180 \text{ }^\circ\text{C}$  for 24 h prior to gas sorption measurements.

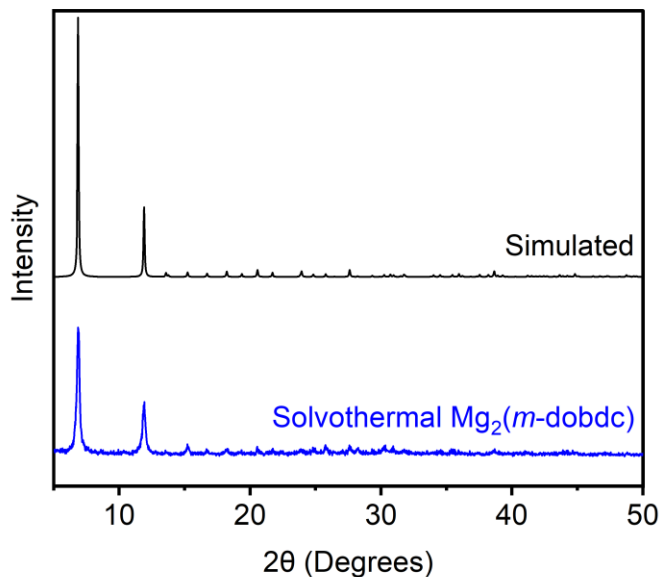

**Figure S6.** PXRD pattern ( $\lambda = 1.5406 \text{ \AA}$ ) of acetone-solvated  $\text{Mg}_2(m\text{-dobdc})\text{-ST}$  prepared under solvothermal conditions. The simulated pattern based on the previously reported single-crystal X-ray diffraction structure of the isostructural framework  $\text{Co}_2(m\text{-dobdc})$  is included for reference.<sup>6</sup>

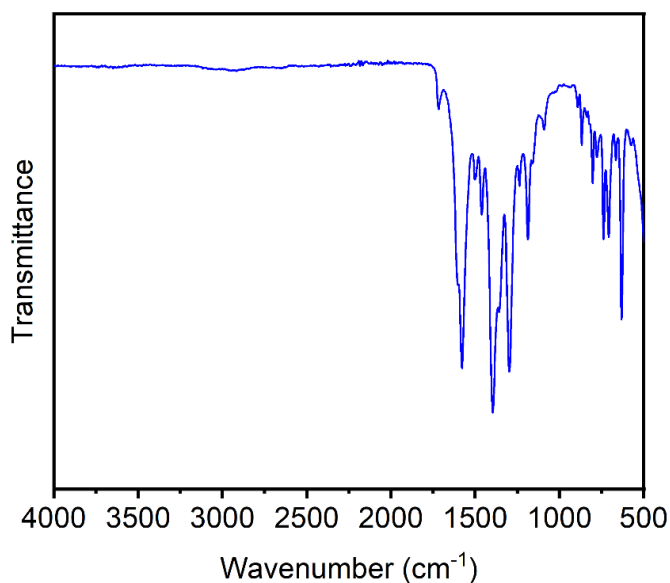

**Figure S7.** ATR IR spectrum of acetone-solvated  $\text{Mg}_2(m\text{-dobdc})\text{-ST}$  prepared under solvothermal conditions.

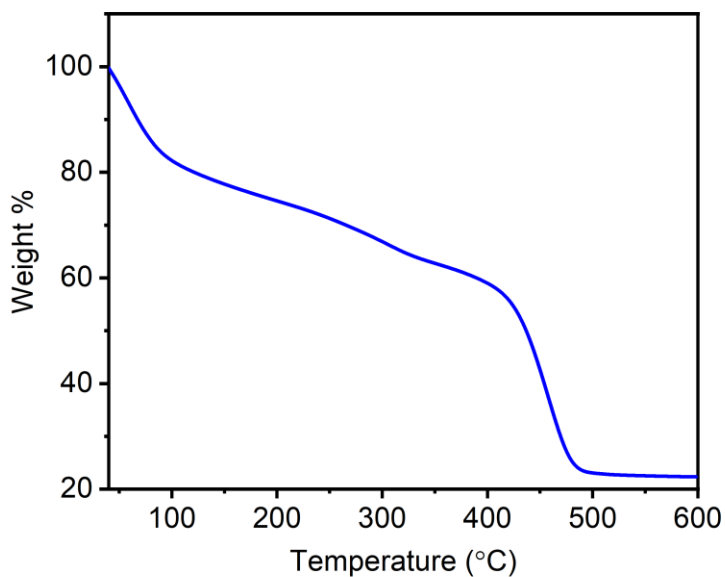

**Figure S8.** Thermogravimetric decomposition profile under  $N_2$  of acetone-solvated  $Mg_2(m\text{-dobdc})\text{-ST}$  prepared under solvothermal conditions.

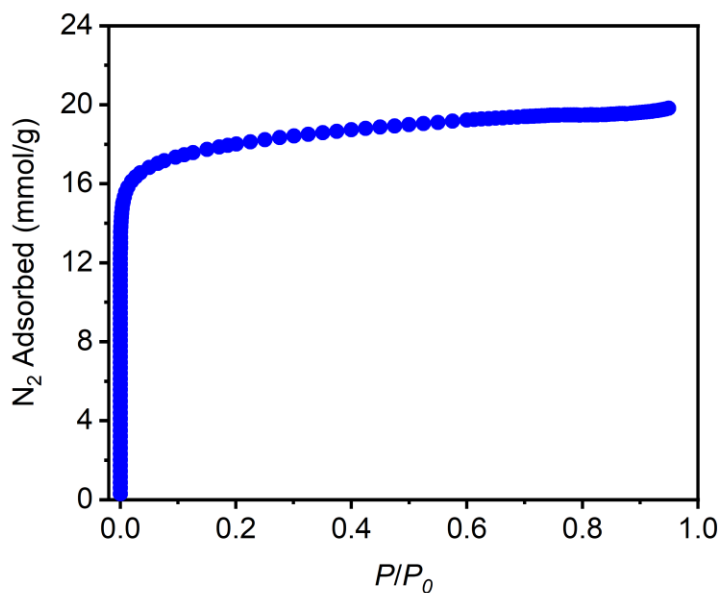

**Figure S9.** 77 K  $N_2$  adsorption isotherm of activated  $Mg_2(m\text{-dobdc})\text{-ST}$  prepared under solvothermal conditions. Fitting the data yielded a BET surface area of  $1556 \pm 2 \text{ m}^2/\text{g}$  and a Langmuir surface area of  $1971 \pm 3 \text{ m}^2/\text{g}$ . Note: (re-)activation of  $Mg_2(m\text{-dobdc})$  at ramp rates faster than  $1 \text{ }^\circ\text{C}/\text{min}$  consistently produced lower surface areas, likely due to partial pore collapse.<sup>1</sup>

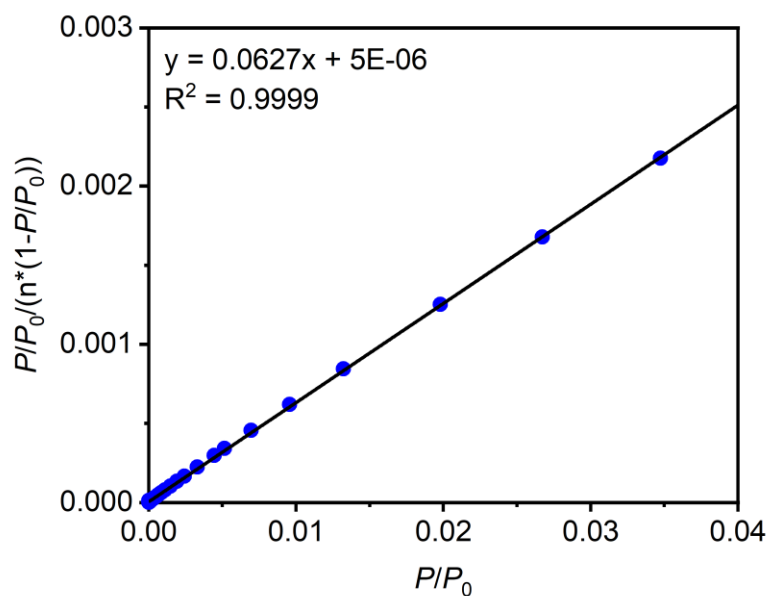

**Figure S10.** Linearized BET plot for the data in Figure S9.

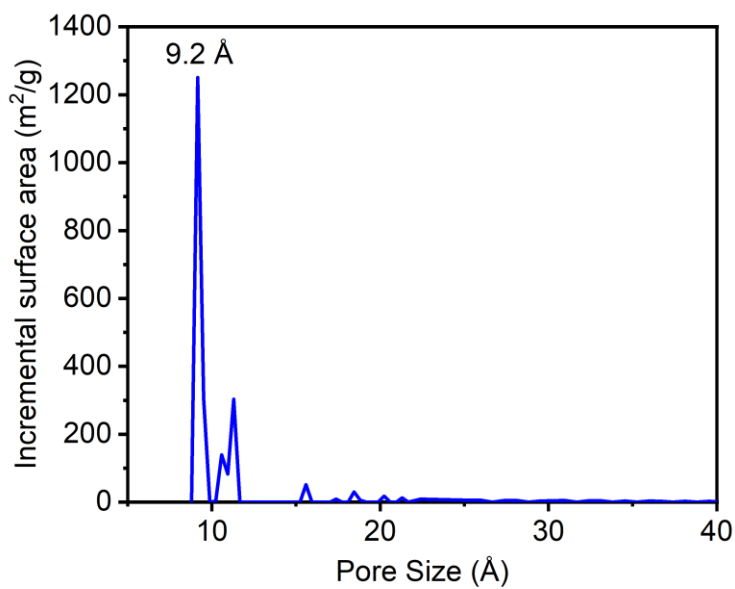

**Figure S11.** Density functional theory-calculated pore size distribution for  $Mg_2(m\text{-dobdc})\text{-ST}$  prepared under solvothermal conditions, assuming a cylindrical pore shape with a metal oxide surface.

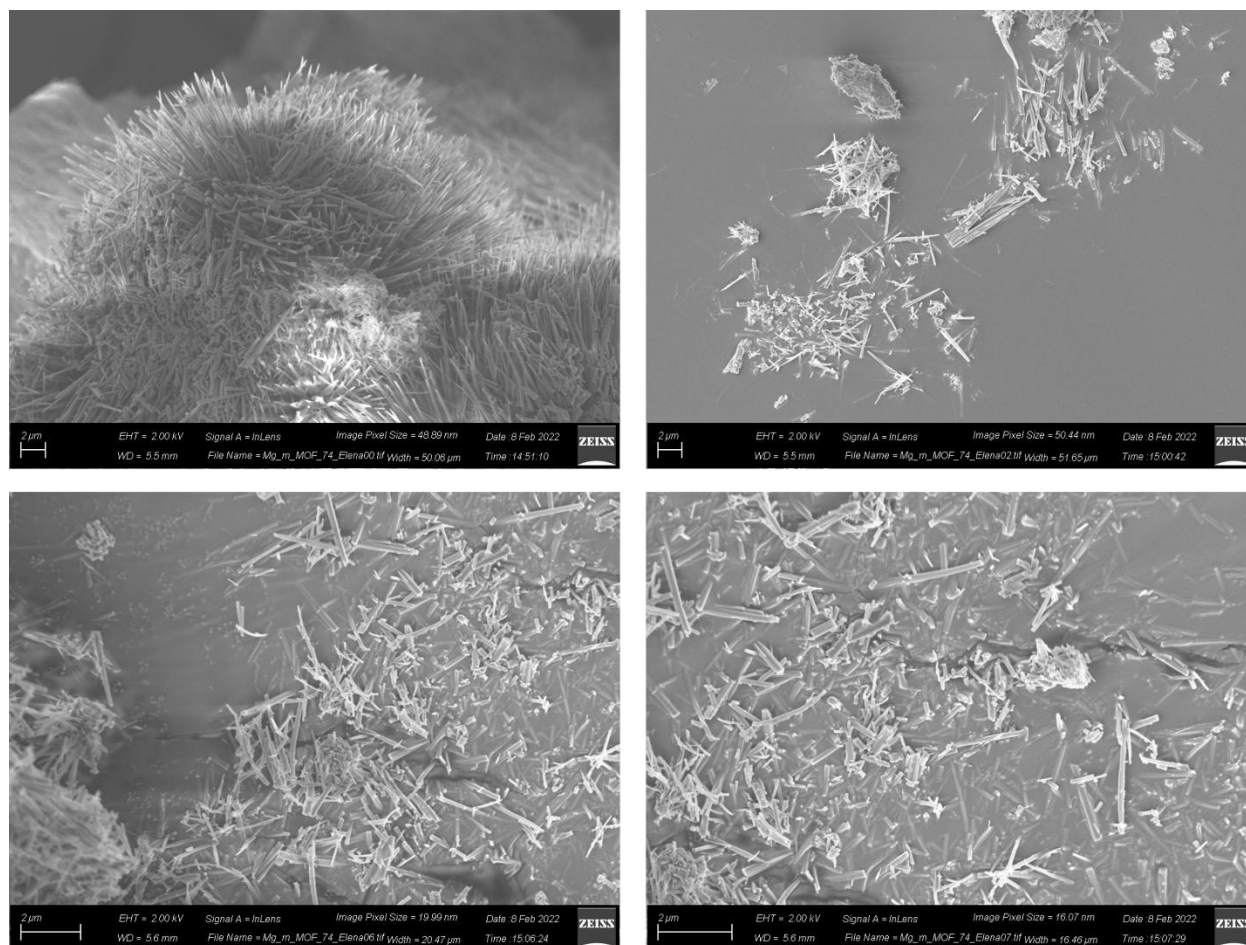

**Figure S12.** SEM images of  $\text{Mg}_2(m\text{-dobdc})\text{-ST}$  prepared under solvothermal conditions.

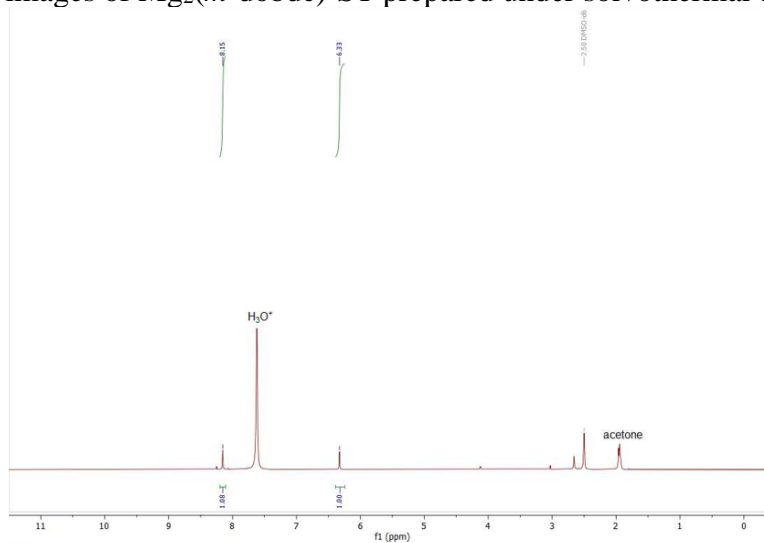

**Figure S13.**  $^1\text{H}$  NMR (400 MHz,  $\text{DMSO-d}_6$ ) spectrum of acetone-solvated  $\text{Mg}_2(m\text{-dobdc})\text{-ST}$  digested with a 35 wt % DCl in  $\text{D}_2\text{O}$  solution. Only  $\text{H}_4m\text{-dobdc}$  and trace residual solvents (not DMF) are present.

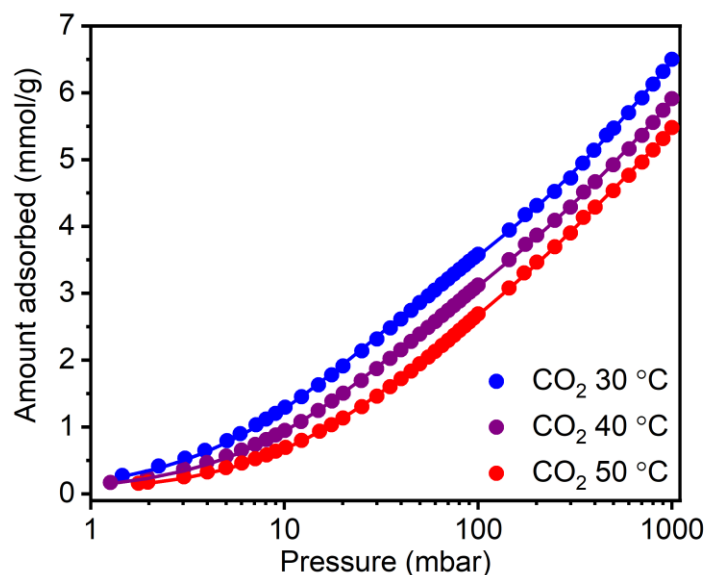

**Figure S14.** CO<sub>2</sub> adsorption isotherms at 30 °C (blue), 40 °C (purple), and 50 °C (red) for Mg<sub>2</sub>(*m*-dobdc)-ST prepared under solvothermal conditions plotted on a logarithmic scale. The lines correspond to individual fits to the dual-site Langmuir model. A data point was considered equilibrated when <0.01% pressure change occurred over a 30 s interval. The sample was reactivated at 180 °C for >4 h under high vacuum (<10 μbar) between isotherms.

**Table S2.** Langmuir fit parameters determined from the independent fits in Figure S14 or from simultaneous fits to the dual-site Langmuir model for CO<sub>2</sub> adsorption in Mg<sub>2</sub>(*m*-dobdc)-ST prepared under solvothermal conditions.

|                            | 30 °C       | 40 °C       | 50 °C       | Simultaneous |
|----------------------------|-------------|-------------|-------------|--------------|
| Q <sub>sat1</sub> (mmol/g) | 3.562387813 | 3.299342495 | 2.954564311 | 5.27463508   |
| S1 (in multiples of R)     | 0.00253983  | 0.002539961 | 0.002540084 | 10.6874703   |
| E1 (kJ/mol)                | 9.948367236 | 9.370755752 | 8.782091805 | 27.7162161   |
| V1                         | 1           | 1           | 1           | 1            |
| Q <sub>sat2</sub> (mmol/g) | 5.537449622 | 4.903756992 | 4.506572941 | 3.44815083   |
| S2 (in multiples of R)     | 0.074038927 | 0.616263689 | 0.551761337 | 10.852239    |
| E2 (kJ/mol)                | 0.557778332 | 2.037498801 | 2.287089469 | 37.4268706   |
| V2                         | 1           | 1           | 1           | 1            |
| R <sup>2</sup>             | 0.999833604 | 0.999859376 | 0.999861773 | 0.99966551   |

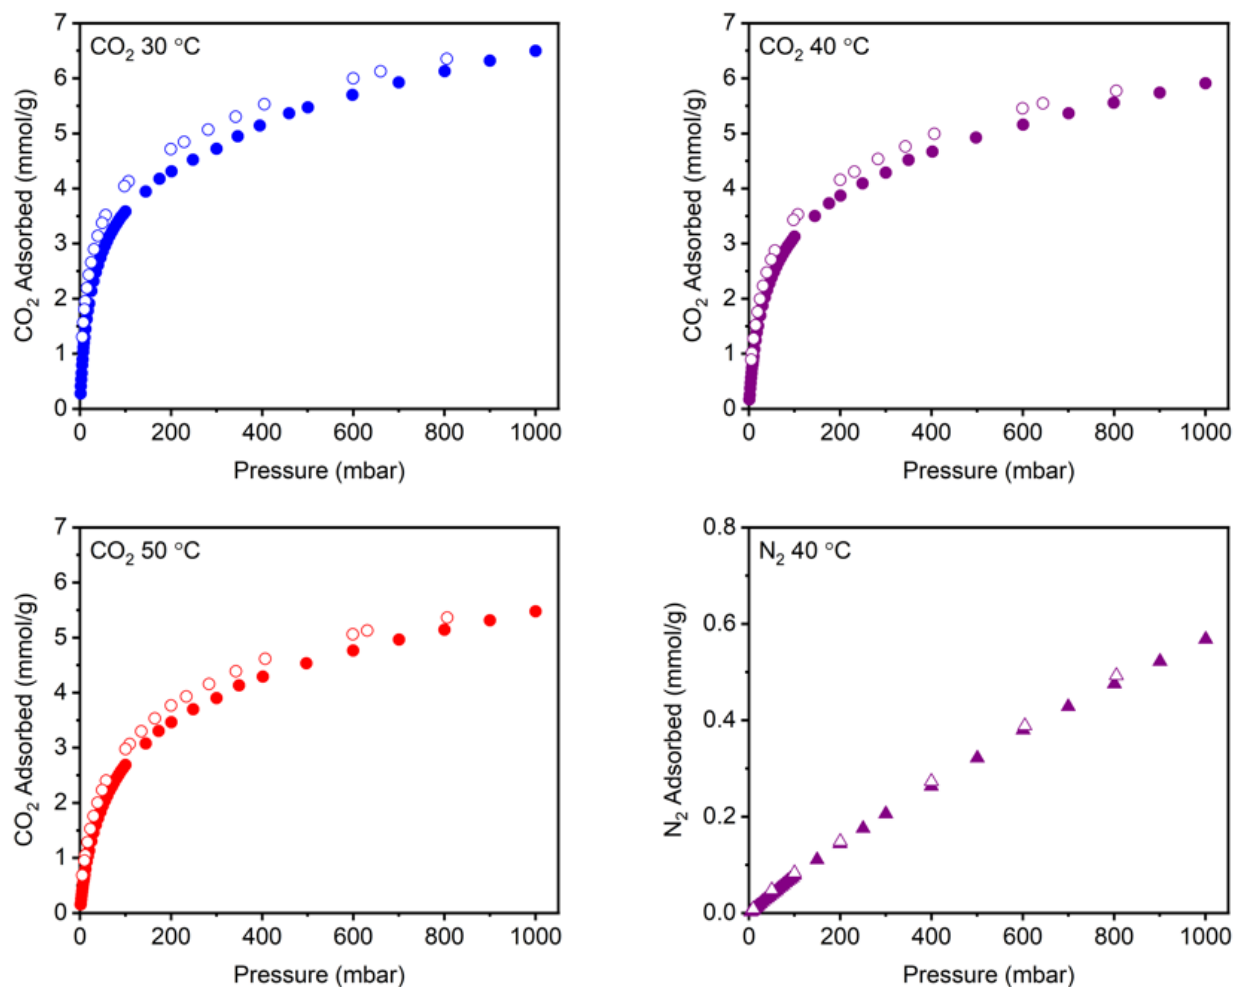

**Figure S15.** CO<sub>2</sub> adsorption (filled circles) and desorption (open circles) isotherms at 30 °C, 40 °C, and 50 °C, along with N<sub>2</sub> adsorption (filled triangles) and desorption (open triangles) at 40 °C, for Mg<sub>2</sub>(*m*-dobdc)-ST prepared under solvothermal conditions. A data point was considered equilibrated when <0.01% pressure change occurred over a 30 s interval. The sample was reactivated at 180 °C for >4 h under high vacuum (<10 μbar) between isotherms. The adsorption data are included in main text Figure 6.

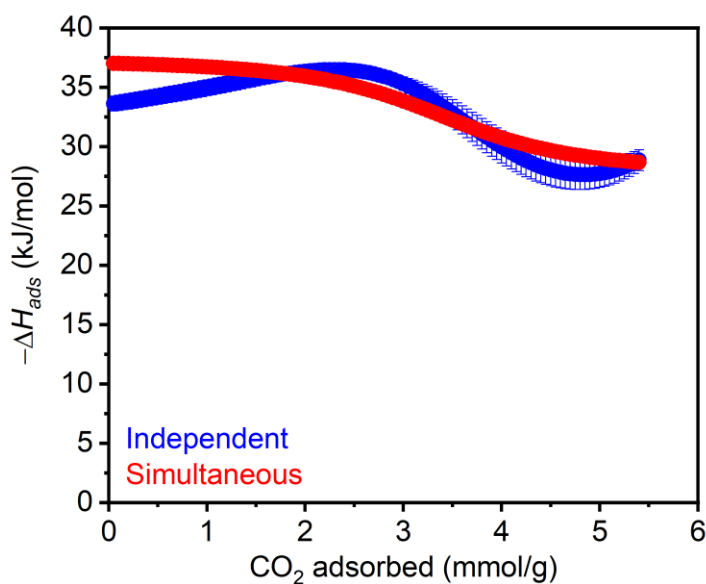

**Figure S16.** Heats of  $\text{CO}_2$  adsorption ( $-\Delta H_{ads}$ ) as a function of uptake in  $\text{Mg}_2(m\text{-dobdc})\text{-ST}$  prepared under solvothermal conditions. The results from both independent and simultaneous fits to the dual-site Langmuir model are shown. The data for the simultaneous fits are included in main text Figure 6. Error bars are included and are too small to see in some cases.

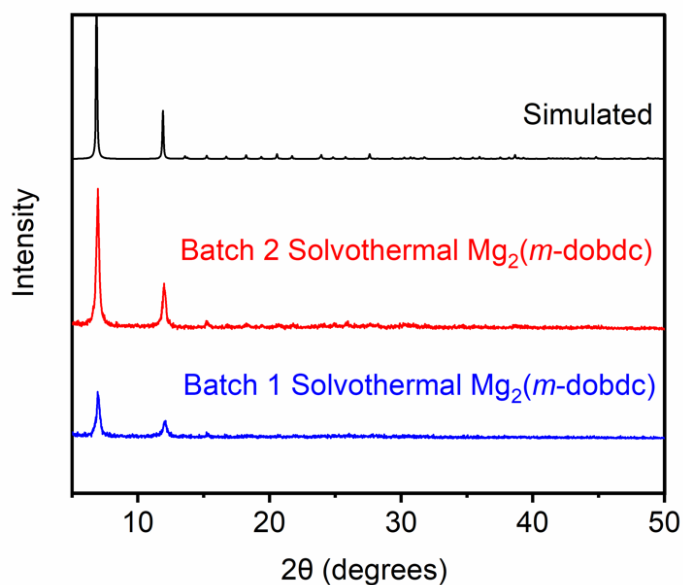

**Figure S17.** PXRD patterns ( $\lambda = 1.5406 \text{ \AA}$ ) of two separate batches of acetone-solvated  $\text{Mg}_2(m\text{-dobdc})\text{-ST}$  prepared under the optimized solvothermal conditions, confirming the reproducibility of this procedure. The simulated pattern based on the previously reported single-crystal X-ray diffraction structure of the isostructural framework  $\text{Co}_2(m\text{-dobdc})$  is included for reference.<sup>6</sup>

#### 4. Synthesis and characterization of mechanochemical (MC) $\text{Mg}_2(m\text{-dobdc})\text{-MC}$ .

##### a. Optimization of mechanochemical $\text{Mg}_2(m\text{-dobdc})\text{-MC}$ synthesis.

**Procedure for small-scale mechanochemical reactions (Table S3).** Small-scale syntheses were performed in 25 mL tungsten carbide vessels, using twelve tungsten carbide balls ( $\phi = 2.0$  mm) in each vessel, with a Fritsch Pulverisette 7 ball mill (two vessels were used per synthesis). Each vessel was charged with  $\text{H}_4m\text{-dobdc}$  (49.5 mg, 0.250 mmol, 1.00 equiv.), metal salt (0.750 mmol, 3.00 equiv.), and organic base (1.10 mmol, 4.40 equiv.), as indicated in Table S3. The reaction mixture was then milled at 600 rpm for either 1, 5, or 10 min as indicated in Table S3. The product was rinsed out with methanol (15 mL) and filtered, using sonication as needed to remove the product from the vessel. PXRD patterns were collected on freshly-washed solids. The tested conditions are based on those previously reported for the preparation of  $\text{M}_2(\text{dobdc})$  MOFs under mechanochemical conditions.<sup>1,7</sup>

**Table S3.** Mechanochemical  $\text{Mg}_2(m\text{-dobdc})\text{-MC}$  synthesis attempts.

| Condition | Base                  | Time (min) | Salt                                                 | Result                                    |
|-----------|-----------------------|------------|------------------------------------------------------|-------------------------------------------|
| 1         | Hünig's base          | 1          | $\text{Mg}(\text{NO}_3)_2 \cdot 6\text{H}_2\text{O}$ | Pink solid, incorrect phase               |
| 2         |                       | 5          |                                                      | Pink-brown solid, amorphous solid         |
| 3         |                       | 10         |                                                      | Pink-brown, incorrect phase               |
| 4         | $\text{Et}_3\text{N}$ | 1          |                                                      | Pink, amorphous solid                     |
| 5         |                       | 5          |                                                      | Gray solid, $\text{Mg}_2(m\text{-dobdc})$ |
| 6         |                       | 10         |                                                      | Gray solid, $\text{Mg}_2(m\text{-dobdc})$ |
| 7         |                       | 5          | $\text{Mg}(\text{OAc})_2 \cdot 4\text{H}_2\text{O}$  | Gray solid, $\text{Mg}_2(m\text{-dobdc})$ |
| 8         |                       | 5          | $\text{MgO}$                                         | Pink solid, $\text{MgO}$                  |
| 9         | 2,6-lutidine          | 5          | $\text{Mg}(\text{NO}_3)_2 \cdot 6\text{H}_2\text{O}$ | No solid                                  |



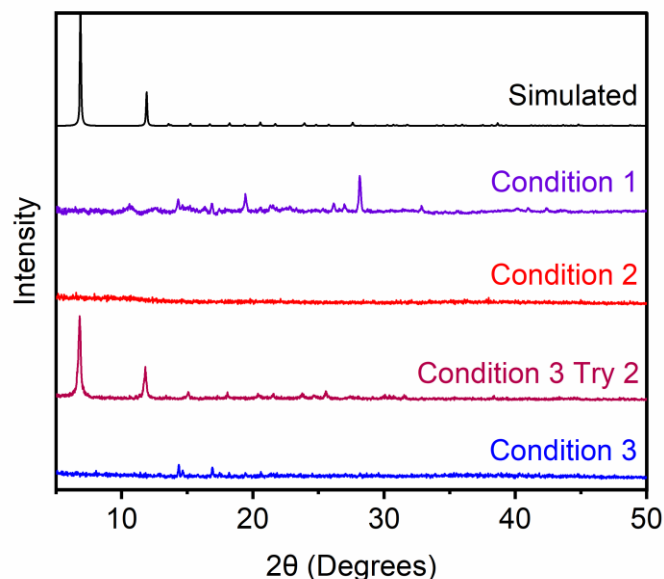

**Figure S18.** PXRD patterns ( $\lambda = 1.5406 \text{ \AA}$ ) of mechanochemical  $\text{Mg}_2(m\text{-dobdc})\text{-MC}$  synthesis attempts using Hünig's base. The previously reported method (Condition 3) was found to be modestly reproducible.<sup>1</sup> The simulated pattern based on the previously reported single-crystal X-ray diffraction structure of the isostructural framework  $\text{Co}_2(m\text{-dobdc})$  is included for reference.<sup>6</sup>

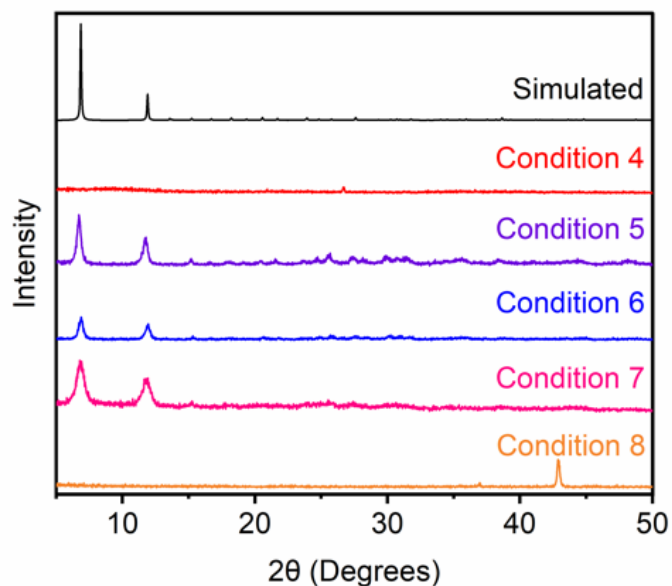

**Figure S19.** PXRD patterns ( $\lambda = 1.5406 \text{ \AA}$ ) of mechanochemical  $\text{Mg}_2(m\text{-dobdc})\text{-MC}$  synthesis attempts using  $\text{Et}_3\text{N}$ . Conditions 5 and 6 (Table S3) yielded the highest quality material and thus Condition 6 was employed for large-scale synthesis of  $\text{Mg}_2(m\text{-dobdc})\text{-MC}$ . The simulated pattern based on the previously reported single-crystal X-ray diffraction structure of the isostructural framework  $\text{Co}_2(m\text{-dobdc})$  is included for reference.<sup>6</sup>

## b. Large-scale synthesis of mechanochemical $\text{Mg}_2(m\text{-dobdc})\text{-MC}$ .

**Procedure for large-scale mechanochemical synthesis.** Two 25 mL tungsten carbide vessels filled with twelve tungsten carbide balls ( $\phi = 2.0$  mm) were each charged with  $\text{H}_4m\text{-dobdc}$  (198 mg, 1.00 mmol, 1.00 equiv.),  $\text{Mg}(\text{NO}_3)_2 \cdot 6\text{H}_2\text{O}$  (768 mg, 3.00 mmol, 3.00 equiv.), and  $\text{Et}_3\text{N}$  (0.612 mL, 4.40 mmol, 4.40 equiv.). The reaction mixtures were then milled at 600 rpm for 10 min. The product was rinsed out with methanol (50 mL) and filtered, using sonication as needed to remove the product from the vessels. The gray-white solid was transferred to a 500 mL Pyrex jar. MeOH (250 mL) was added, and the jar was placed in an oven that had been pre-heated to 60 °C. The jar was allowed to stand at 60 °C for 24 h. At this time, the jar was allowed to cool to room temperature, and the MeOH was decanted. Fresh MeOH (250 mL) was added, and the jar was returned to the oven. This process was repeated for a total of two hot MeOH washes. After decanting the final MeOH wash, acetone (250 mL) was added to the jar, and the jar was allowed to stand at room temperature. The soaking process outlined above was repeated for a total of two room temperature acetone washes. After the final acetone wash was decanted, the solid was transferred to a 10 mL Schlenk flask and activated under high vacuum ( $<100$  mbar) at 180 °C in a sand bath (ramp rate 1 °C/min) for 24 h to yield activated  $\text{Mg}_2(m\text{-dobdc})$  (459 mg, 95% yield) as an off-white solid. Approximately 50 mg of MOF was transferred to a Micromeritics ASAP tube and activated under high vacuum ( $<10$   $\mu\text{bar}$ ) at 180 °C for 24 h prior to gas sorption measurements.

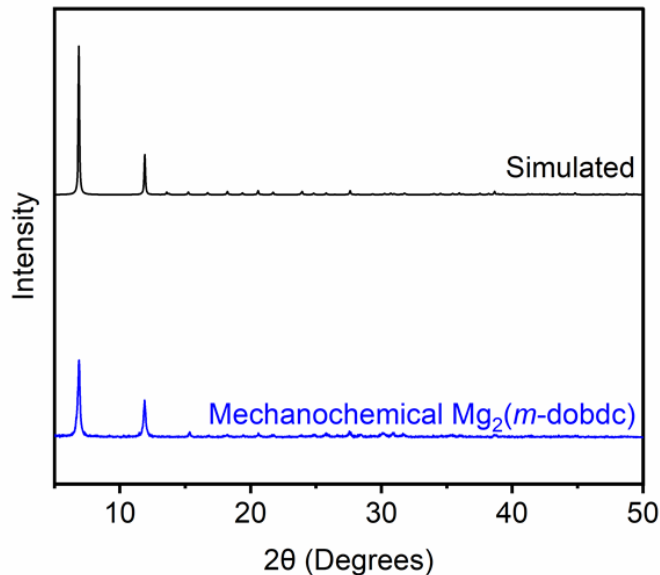

**Figure S20.** PXRD pattern ( $\lambda = 1.5406$  Å) of acetone-solvated  $\text{Mg}_2(m\text{-dobdc})\text{-MC}$  prepared under mechanochemical conditions. The simulated pattern based on the previously reported single-crystal X-ray diffraction structure of the isostructural framework  $\text{Co}_2(m\text{-dobdc})$  is included for reference.<sup>2</sup>

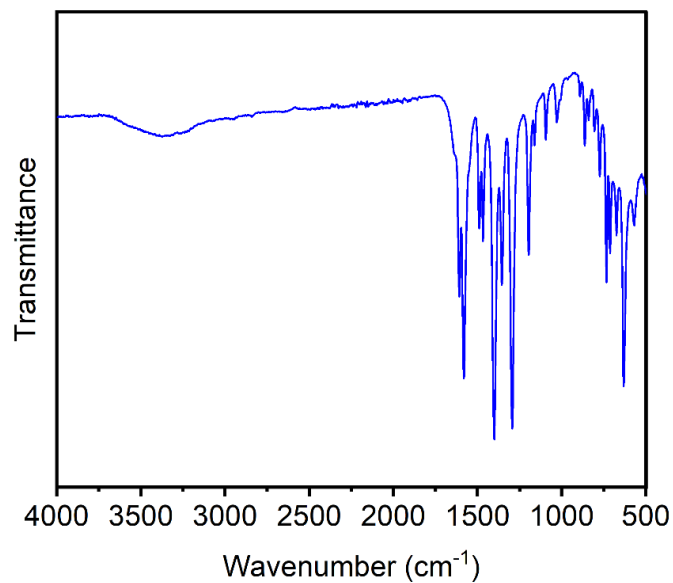

**Figure S21.** ATR IR spectrum of acetone-solvated  $\text{Mg}_2(m\text{-dobdc})\text{-MC}$  prepared under mechanochemical conditions.

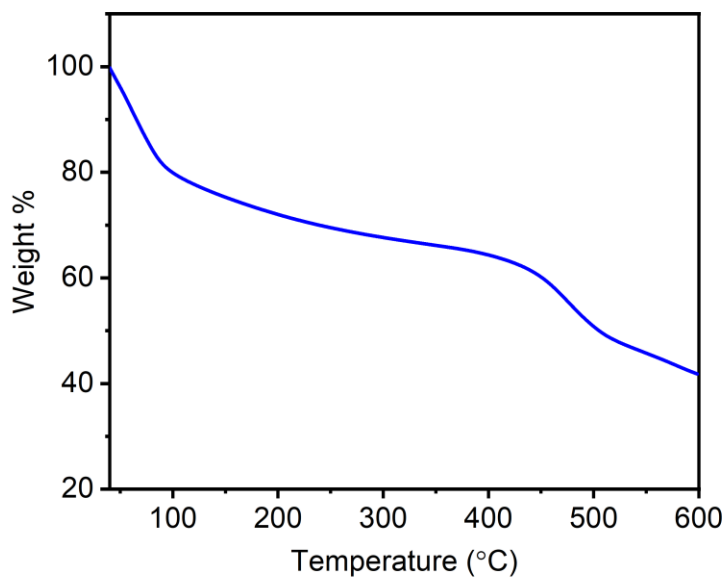

**Figure S22.** Thermogravimetric decomposition profile under  $\text{N}_2$  of acetone-solvated  $\text{Mg}_2(m\text{-dobdc})\text{-MC}$  prepared under mechanochemical conditions.

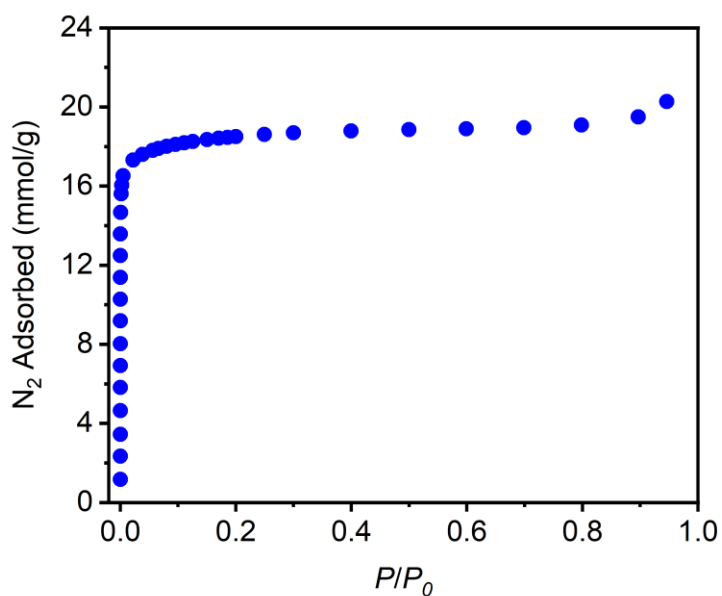

**Figure S23.** 77 K  $N_2$  adsorption (filled circles) and desorption (open circles) isotherm of activated  $Mg_2(m\text{-dobdc})\text{-MC}$  prepared under mechanochemical conditions. Fitting the data yielded a BET surface area of  $1653 \pm 2 \text{ m}^2/\text{g}$  and a Langmuir surface area of  $1964 \pm 38 \text{ m}^2/\text{g}$ .

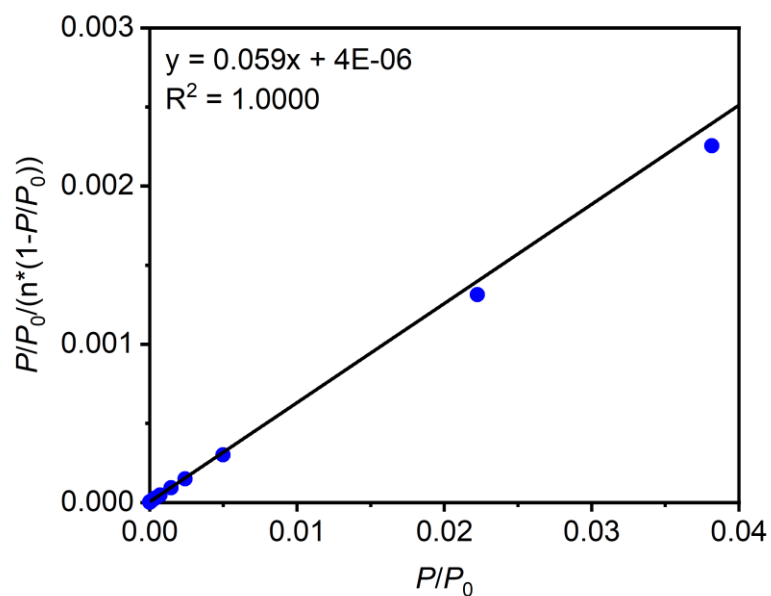

**Figure S24.** Linearized BET plot for the data in Figure S23.

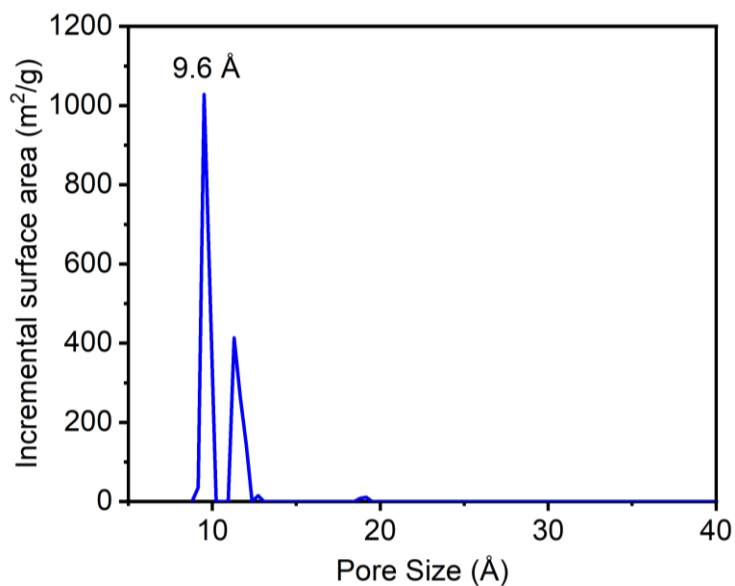

**Figure S25.** Density functional theory-calculated pore size distribution for  $\text{Mg}_2(m\text{-dobdc})\text{-MC}$  prepared under mechanochemical conditions, assuming a cylindrical pore shape with a metal oxide surface.

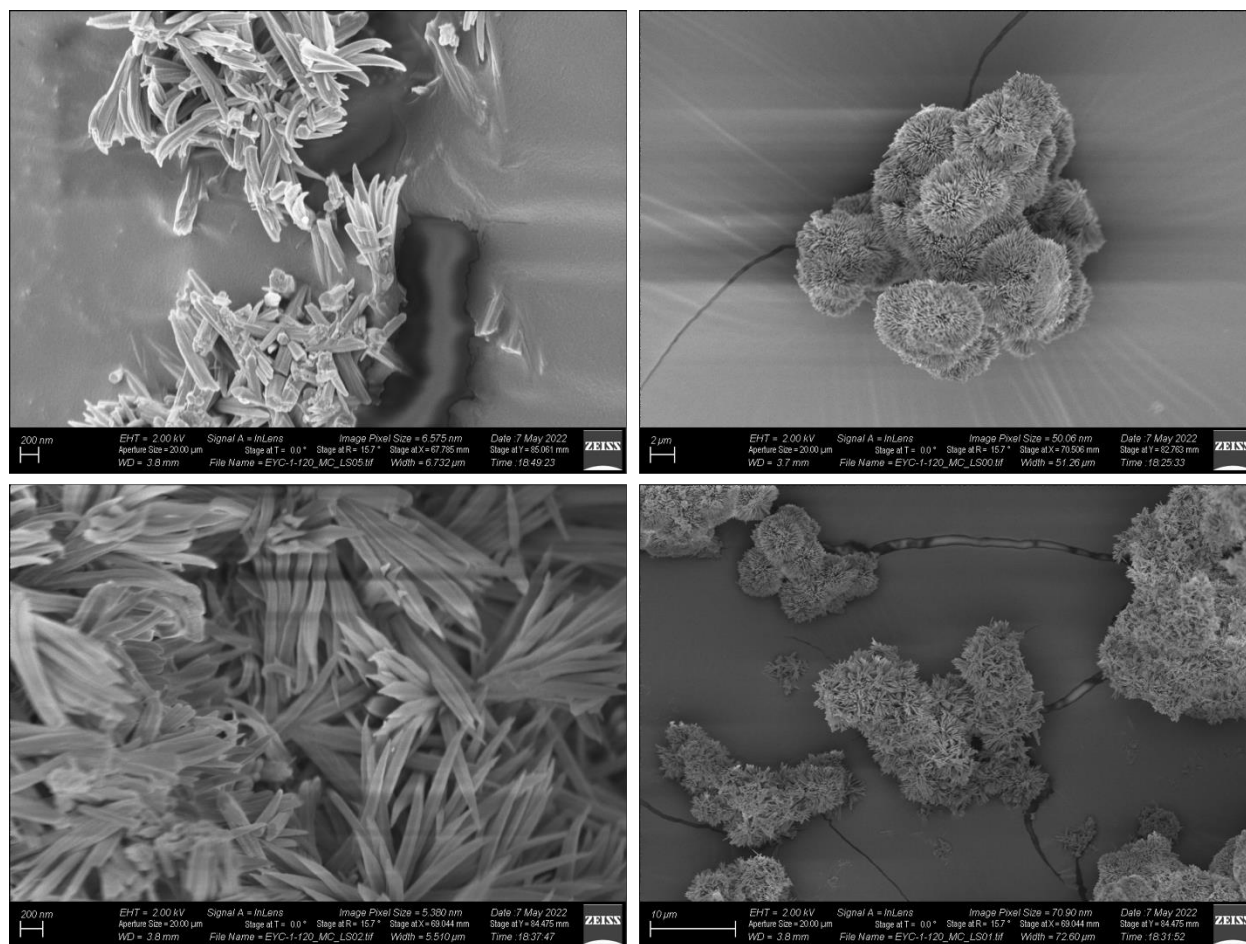

**Figure S26.** SEM images of  $\text{Mg}_2(m\text{-dobdc})\text{-MC}$  prepared under mechanochemical conditions.

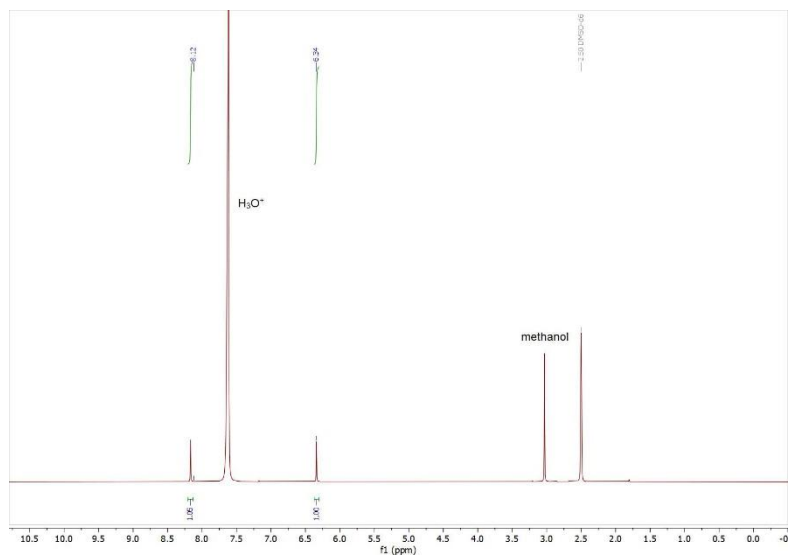

**Figure S27.** <sup>1</sup>H NMR (400 MHz, DMSO-d<sub>6</sub>) spectrum of acetone-solvated Mg<sub>2</sub>(*m*-dobdc)-MC digested with a 35 wt % DCl in D<sub>2</sub>O solution. Only H<sub>4</sub>*m*-dobdc and trace residual solvents (not DMF) are present.

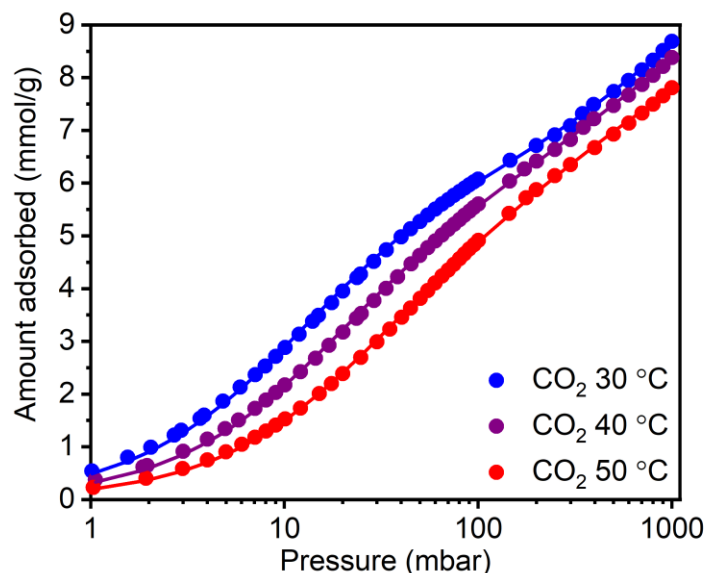

**Figure S28.** CO<sub>2</sub> adsorption isotherms at 30 °C (blue), 40 °C (purple), and 50 °C (red) for Mg<sub>2</sub>(*m*-dobdc)-MC prepared under mechanochemical conditions plotted on a logarithmic scale. The lines correspond to individual fits to the dual-site Langmuir model. A data point was considered equilibrated when <0.01% pressure change occurred over a 30 s interval. The sample was reactivated at 180 °C for >4 h under high vacuum (<10 μbar) between isotherms.

**Table S4.** Langmuir fit parameters determined from the independent fits in Figure S28 or from simultaneous fits to the dual-site Langmuir model for CO<sub>2</sub> adsorption in Mg<sub>2</sub>(*m*-dobdc)-MC prepared under mechanochemical conditions.

|                            | 30 °C       | 40 °C       | 50 °C       | Simultaneous |
|----------------------------|-------------|-------------|-------------|--------------|
| Q <sub>sat1</sub> (mmol/g) | 6.249672064 | 5.996773132 | 5.584896351 | 4.39224907   |
| S1 (in multiples of R)     | 0.002539467 | 0.00253981  | 0.002539927 | 9.31281549   |
| E1 (kJ/mol)                | 11.15776285 | 10.38790032 | 9.529107367 | 24.3764317   |
| V1                         | 1           | 1           | 1           | 1            |
| Q <sub>sat2</sub> (mmol/g) | 4.927522435 | 4.207318497 | 3.59367734  | 6.1147741    |
| S2 (in multiples of R)     | 0.088861794 | 0.556343845 | 0.464706246 | 12.4317063   |
| E2 (kJ/mol)                | 0.227614138 | 2.268732197 | 2.821630884 | 42.613078    |
| V2                         | 1           | 1           | 1           | 1            |
| R <sup>2</sup>             | 0.999636071 | 0.999709461 | 0.999704503 | 0.99931636   |

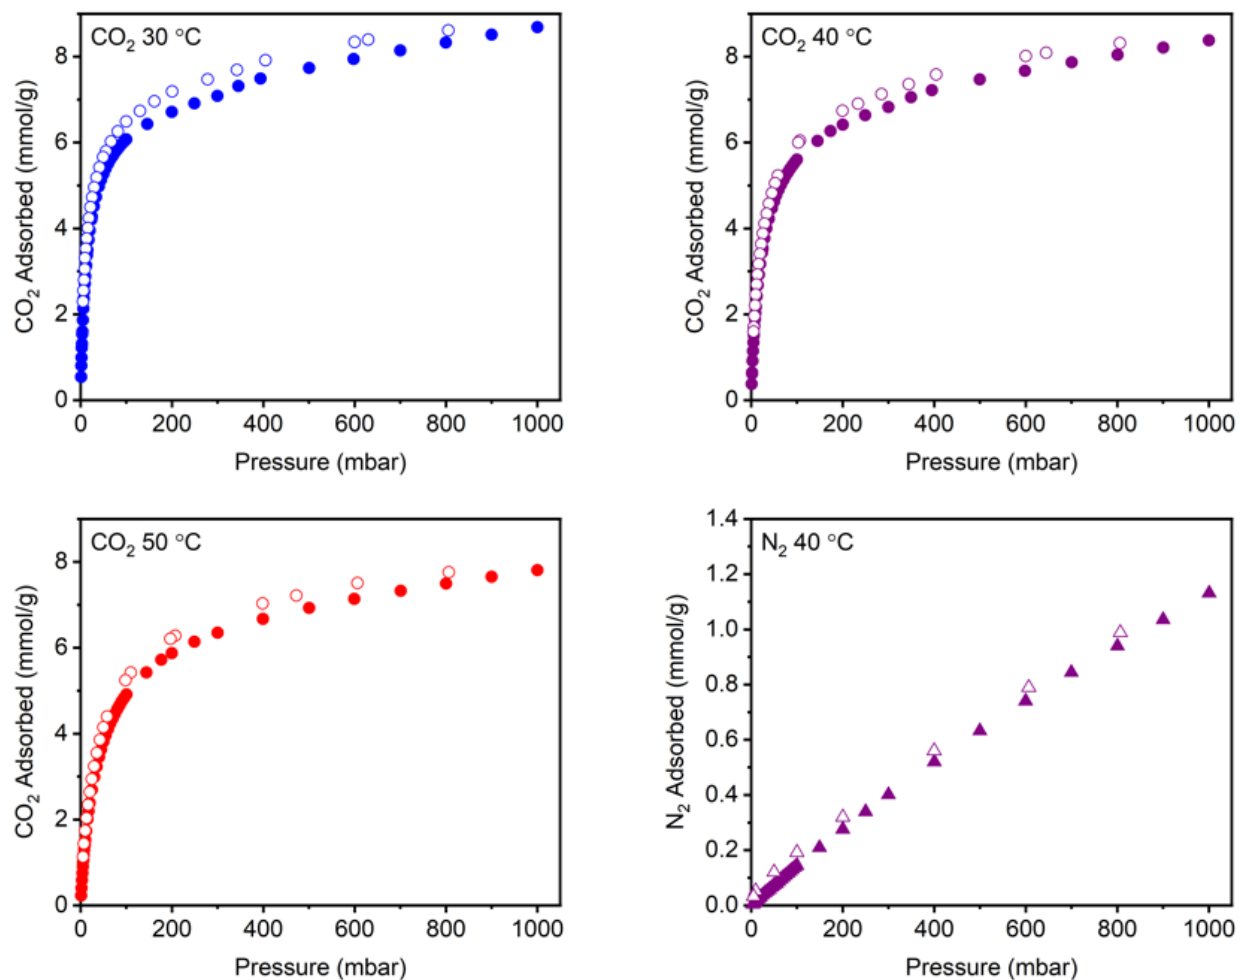

**Figure S29.** CO<sub>2</sub> adsorption (filled circles) and desorption (open circles) isotherms at 30 °C, 40 °C, and 50 °C, along with N<sub>2</sub> adsorption (filled triangles) and desorption (open triangles) at 40 °C, for Mg<sub>2</sub>(*m*-dobdc)-MC prepared under mechanochemical conditions. A data point was considered equilibrated when <0.01% pressure change occurred over a 30 s interval. The sample was reactivated at 180 °C for >4 h under high vacuum (<10 μbar) between isotherms. The adsorption data are included in main text Figure 6.



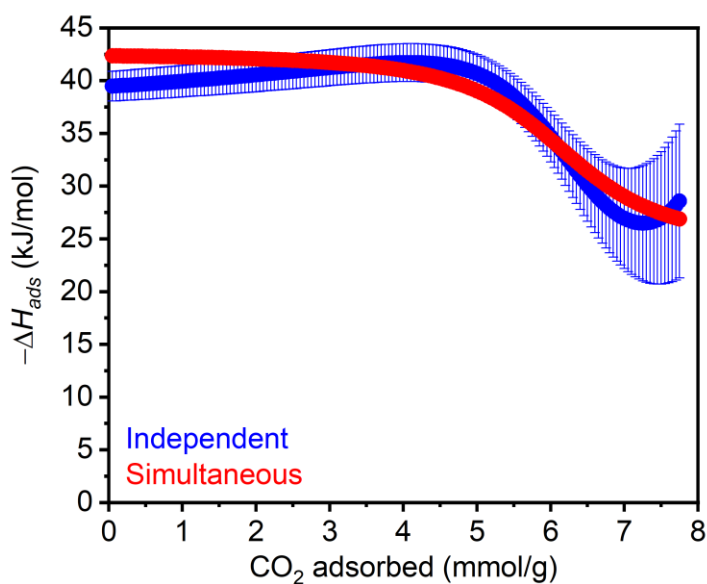

**Figure S30.** Heats of CO<sub>2</sub> adsorption ( $-\Delta H_{ads}$ ) as a function of uptake in Mg<sub>2</sub>(*m*-dobdc)-MC prepared under mechanochemical conditions. The results from both independent and simultaneous fits to the dual-site Langmuir model are shown. The data for the simultaneous fits are included in main text Figure 6. Error bars are included and are too small to see in some cases.

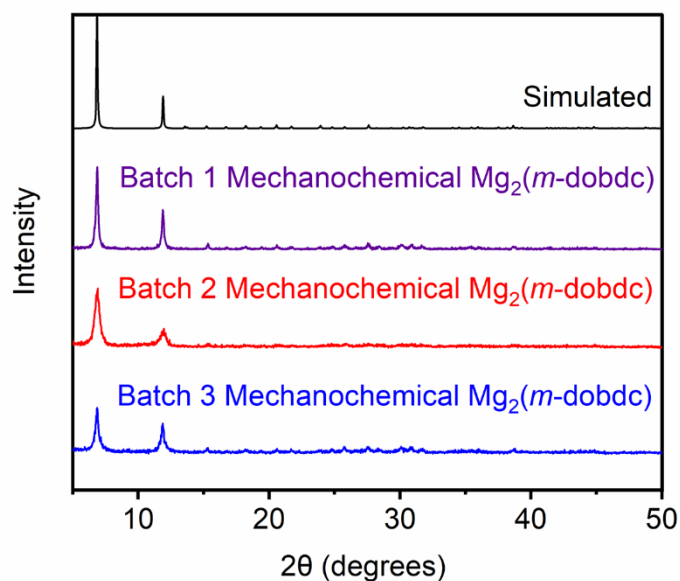

**Figure S31.** PXRD patterns ( $\lambda = 1.5406 \text{ \AA}$ ) of three separate batches of acetone-solvated Mg<sub>2</sub>(*m*-dobdc)-MC prepared under the optimized mechanochemical conditions, confirming the reproducibility of this procedure. The simulated pattern based on the previously reported single-crystal X-ray diffraction structure of the isostructural framework Co<sub>2</sub>(*m*-dobdc) is included for reference.<sup>6</sup>

## 5. References.

- (1) Wang, Z.; Li, Z.; Ng, M.; Milner, P. J. Rapid Mechanochemical Synthesis of Metal–Organic Frameworks Using Exogenous Organic Base. *Dalton Trans.* **2020**, 49 (45), 16238–16244. <https://doi.org/10.1039/D0DT01240H>.
- (2) Colwell, K. A.; Jackson, M. N.; Torres-Gavosto, R. M.; Jawahery, S.; Vlaisavljevich, B.; Falkowski, J. M.; Smit, B.; Weston, S. C.; Long, J. R. Buffered Coordination Modulation as a Means of Controlling Crystal Morphology and Molecular Diffusion in an Anisotropic Metal–Organic Framework. *J. Am. Chem. Soc.* **2021**, 143 (13), 5044–5052. <https://doi.org/10.1021/jacs.1c00136>.
- (3) Garzón-Tovar, L.; Carné-Sánchez, A.; Carbonell, C.; Imaz, I.; MasPOCH, D. Optimised Room Temperature, Water-Based Synthesis of CPO-27-M Metal–Organic Frameworks with High Space-Time Yields. *J. Mater. Chem. A* **2015**, 3 (41), 20819–20826. <https://doi.org/10.1039/C5TA04923G>.
- (4) Queen, W. L.; Hudson, M. R.; Bloch, E. D.; Mason, J. A.; Gonzalez, M. I.; Lee, J. S.; Gygi, D.; Howe, J. D.; Lee, K.; Darwish, T. A. Comprehensive Study of Carbon Dioxide Adsorption in the Metal–Organic Frameworks  $M_2(\text{dobdc})$  ( $M = \text{Mg, Mn, Fe, Co, Ni, Cu, Zn}$ ). *Chem. Sci.* **2014**, 5 (12), 4569–4581.
- (5) Tranchemontagne, D. J.; Hunt, J. R.; Yaghi, O. M. Room Temperature Synthesis of Metal–Organic Frameworks: MOF-5, MOF-74, MOF-177, MOF-199, and IRMOF-0. *Tetrahedron* **2008**, 64 (36), 8553–8557. <https://doi.org/10.1016/j.tet.2008.06.036>.
- (6) Bachman, J. E.; Kapelewski, M. T.; Reed, D. A.; Gonzalez, M. I.; Long, J. R.  $M_2(m\text{-Dobdc})$  ( $M = \text{Mn, Fe, Co, Ni}$ ) Metal–Organic Frameworks as Highly Selective, High-Capacity Adsorbents for Olefin/Paraffin Separations. *J. Am. Chem. Soc.* **2017**, 139 (43), 15363–15370. <https://doi.org/10.1021/jacs.7b06397>.
- (7) Ayoub, G.; Karadeniz, B.; Howarth, A. J.; Farha, O. K.; Đilović, I.; Germann, L. S.; Dinnebier, R. E.; Užarević, K.; Friščić, T. Rational Synthesis of Mixed-Metal Microporous Metal–Organic Frameworks with Controlled Composition Using Mechanochemistry. *Chem. Mater.* **2019**, 31 (15), 5494–5501. <https://doi.org/10.1021/acs.chemmater.9b01068>.
